# Supplementary material
Source: publisher site journal article supplement (https://static.cambridge.org/content/id/urn:cambridge.org:id:article:S0016756820000874/resource/name/S0016756820000874supp001.xls)
Supplement: Supplementary file 1 [file S0016756820000874supp001.xls]

## Sheet: Lipid biomarkers
Geological Magazine
The response of water column and sedimentary enviroments to the advent of the Messinian salinity crisis: Insights from an onshore deep-water section (Govone, NW Italy)
Mathia Sabinoa, Francesco Dela Pierreb, Marcello Natalicchiob, Daniel Birgela, Susanne Gierc, Jörn Peckmanna
Supplementary Material
aInstitut für Geologie, Centrum für Erdsystemforschung und Nachhaltigkeit, Universität Hamburg, D-20146 Hamburg, Germany
bDipartimento di Scienze della Terra, Università degli Studi di Torino, I-10125 Torino, Italy
cDepartment für Geodynamik und Sedimentologie, Universität Wien, A-1090 Wien, Austria
Samples	Archaeol (%)	GDGT-0 (%)	GDGT-1 (%)	GDGT-2 (%)	GDGT-3 (%)	GDGT-5 (%)	GDGT-5' (regio isomer) (%)	GDGT-0/GDGT-5 ratio*	Lycopane (mg/g TOC)	Lycopane/n-C31 ratio	Tetrahymanol (mg/g TOC)
Gm26.1	14.9218	28.8849	11.1773	12.2108	2.73181	26.2927	3.78062	1.09859	6.79944	0.435576	5.88857
Gm26.3	15.7356	29.1891	8.14132	11.7469	1.60887	30.3903	3.18783	0.960475	0	0	1.32449
Gm27.1	23.1403	25.9575	8.64262	12.7019	2.68117	22.8463	4.03017	1.13618	2.97865	0.203585	7.46038
Gm27.3	7.81493	26.4043	11.8694	14.5003	2.52081	32.8816	4.00869	0.803012	0.120045	0.0103597	1.99175
Gm28.1	36.4129	23.242	5.51478	10.0935	2.3778	19.6092	2.74991	1.18526	d.n.a.	d.n.a.	12.0176
Gm28.2	42.8669	17.9648	7.55459	8.58798	2.39301	18.2895	2.3432	0.982248	4.57624	0.333249	4.10717
Gm28.4	19.8197	24.4609	9.04863	13.6612	2.5879	26.519	3.9026	0.922391	0.0847063	0.0222061	2.33056
Gm29.1	28.109	22.7229	9.68699	9.81845	3.08955	23.6855	2.88759	0.959359	18.1969	0.956507	6.93717
Gm29.2	35.8619	21.5564	8.26707	7.94784	2.74506	20.9272	2.69453	1.03007	25.0265	1.1974	11.3316
Gm29.3	19.7039	26.8275	8.20974	11.4329	2.32729	28.2247	3.2739	0.950496	0.189749	0.0398953	1.09527
Gm30.1	23.6408	30.4404	10.6646	8.3048	1.94175	23.0841	1.92347	1.31868	0.84467	0.0677532	26.4844
Gm30.2	29.3929	26.4466	6.58018	9.48667	1.75928	23.2157	3.11869	1.13917	0.281055	0.0431989	2.94837
Gm30.3	24.6182	25.2592	8.65005	9.3247	2.23098	26.369	3.54791	0.957915	0.39419	0.0234656	1.9475
Gm31.1	15.2892	27.2243	9.66016	11.5038	3.12825	29.03	4.16436	0.937798	4.66783	0.439438	5.70638
Gm31.2	20.404	31.2483	9.48084	10.0712	1.96285	22.9012	3.9316	1.36449	5.97916	0.357293	3.34497
Gm31.4	15.4845	28.0663	9.68013	12.0411	2.04895	29.0904	3.58865	0.964795	0.407418	0.0250417	2.48874
Gm32.1	24.4763	29.4153	8.19016	7.50666	1.79725	25.0862	3.52813	1.17257	8.15052	0.292492	4.22038
Gm32.2	30.9636	30.3522	8.30923	5.55644	1.36659	20.551	2.9009	1.47692	d.n.a.	d.n.a.	7.34414
Gm32.5	34.0199	26.9763	5.4	5.79685	0.957975	25.0615	1.7874	1.07641	0.219288	0.0135841	1.81853
Gm33.1	30.6533	24.7661	7.33084	9.33932	1.75713	24.195	1.95841	1.0236	7.75804	0.13632	3.8621
Gm33.2	26.177	29.066	8.74932	8.84286	1.68157	22.7158	2.76755	1.27955	d.n.a.	d.n.a.	2.84271
*Caldarchaeol/crenarchaeol ratio
d.n.a.= data not available

## Sheet: TC, TIC, TOC and mineralogy
					Intensity in counts of the main peaks
Samples	TC (%)	TIC (%)	TOC (%)		Calcite	Dolomite
Gm26.1	4.6902	2.2441	2.4461		2115	1246
Gm26.2	3.6336	1.8743	1.7593		1826	761
Gm26.3	5.6521	3.7285	1.9236		244	2902
Gm26.4	3.791	2.7784	1.0126		2023	1680
Gm27.1	5.9875	3.0519	2.9356		1270	1798
Gm27.2	3.3422	2.2033	1.1389		1873	746
Gm27.3	4.5939	3.0178	1.5761		1114	1963
Gm27.4	3.1136	1.8983	1.2153		1708	749
Gm28.1	5.8375	3.526	2.3115		490	2824
Gm28.2	6.3078	3.478	2.8298		-	2910
Gm28.3	3.0145	1.6711	1.3434		-	1955
Gm28.4	7.1193	4.7137	2.4056		-	3135
Gm28.5	5.5193	3.8498	1.6695		-	2610
Gm29.1	5.0539	1.9973	3.0566		-	2015
Gm29.2	4.1005	1.4097	2.6908		-	1404
Gm29.3	8.5309	5.9989	2.532		-	4157
Gm29.4	6.1314	4.6733	1.4581		-	3289
Gm30.1	5.7017	3.5714	2.1303		-	2693
Gm30.2	6.6705	4.5387	2.1318		-	3418
Gm30.3	3.6957	2.2807	1.415		-	2057
Gm31.1	6.2705	3.5249	2.7456		-	2898
Gm31.2	3.5381	1.2267	2.3114		-	1132
Gm31.3	6.5482	4.8444	1.7038		-	2873
Gm31.4	4.839	3.2259	1.6131		-	2277
Gm31.5	3.4021	2.1127	1.2894		-	3172
Gm32.1	3.3102	1.2635	2.0467		-	2017
Gm32.2	2.3875	0.43346	1.95404		-	825
Gm32.3	5.7774	3.1969	2.5805		-	2396
Gm32.4	6.8966	5.2807	1.6159		-	3433
Gm32.5	3.1023	1.7758	1.3265		-	3185
Gm32.6	6.8221	5.5237	1.2984		-	3558
Gm33.1	1.6798	0.38881	1.29099		-	707
Gm33.2	7.3824	5.1517	2.2307		-	3410

## Sheet: C and O stable isotopes
Samples	cycle	δ13C (‰)	δ18O (‰)			average pre-MSC		Average MSC
GOV B 7.1*	Gm 26	-0.2	-3.91		δ13C (‰)	-1.00269		-2.39755
GOV B 7.2*	Gm 26	-2.1	5.4		δ18O (‰)	2.06925		3.52802
GOV B 7.3*	Gm 26	0.28	-4.47
GOV B 7.4*	Gm 27	-1.7	2.5
GOV B 8.1*	Gm 27	-0.36	-0.32
GOV B 8.2*	Gm 27	0.28	-4.25
GOV B 9.1*	Gm 28	-2.17	4.88
GOV B 9.2*	Gm 28	0.34	-0.01
GOV B 9.3*	Gm 28	-1.3	4.9
GOV B 9.4*	Gm 29	-0.9	5
GM 29*	Gm 29	-2.3	5.1
Gm29.3	Gm 29	-2.70041	4.87868
GOV B 10.3*	Gm 29	-0.42	3.79
GOV B 10.4*	Gm 30	-0.42	2.64
GOV B 10.5*	Gm 30	-1.37	4.91
GOV B 11.2*	Gm 30	-0.42	3.79
GOV B 11.4*	Gm 31	-0.91	-3.14
Gm31.2	Gm 31	-0.814933	3.15198
Gm31.3	Gm 31	-1.48073	4.92741
GOV B 12.1*	Gm 31	-4.42	5.11
GM 31.1*	Gm 31	-0.4	3.7
Gm31.5	Gm 31	-0.404747	3.63701
GM 32.1*	Gm 32	-1.4	2.9
Gm32.3	Gm 32	-2.79479	5.44904
Gm32.4	Gm 32	-4.17328	5.45363
GM 32.2*	Gm 32	-5.2	2.9
Gm32.5	Gm 32	-2.61944	4.69841
Gm32.6	Gm 32	-4.22885	3.45902
Gm33.2	Gm 33	-4.29887	3.35582
Notes:
* samples from Bernardi, 2013
Correction factors for δ18O values:
Samples from Bernardi (2013) were corrected by −0.8‰ according to Sharma & Clayton (1965) for analyses performed at T= 323.15 °K. The new samples were corrected for −1.2‰. This values was obteined as the difference between the fractionation among CO2 and solid dolomite according to Rosenbaum & Sheppard, (1986) (103ln = 6.65 x 105 x (1/T2) + 4.23) and CO2 and solid calcite according to Kim et al …
Sharma, T. & Clayton, R.N. 1965. Measurement of O18/O16 ratios of total oxygen of carbonates. Geochimica et Cosmochimica Acta 29(12), 1347–1353.
Rosenbaum, J. & Sheppard, S.M.F. 1986. An isotopic study of siderites, dolomites and ankerites at high temperatures. Geochimica et Cosmochimica Acta 50(6), 1147–1150.
Kim, S.T., Mucci, A. & Taylor, B.E. 2007. Phosphoric acid fractionation factors for calcite and aragonite between 25 and 75 °C: Revisited. Chemical Geology 246(3–4), 135–146.

## Sheet: Correlation δ13C-TIC
Samples	cycle	δ13C (‰)	TIC (%)
GOV B 9.3*	Gm 28	-1.3	3.8498
GOV B 9.4*	Gm 29	-0.9	1.4097
Gm29.3	Gm 29	-2.70041	5.9989
GOV B 10.4*	Gm 30	-0.42	3.5714
GOV B 11.4*	Gm 31	-0.91	3.5249
Gm31.2	Gm 31	-0.814933	1.2267
Gm31.3	Gm 31	-1.48073	4.8444
Gm31.5	Gm 31	-0.404747	2.1127
Gm32.3	Gm 32	-2.79479	3.1969
Gm32.4	Gm 32	-4.17328	5.2807
Gm32.5	Gm 32	-2.61944	1.7758
Gm32.6	Gm 32	-4.22885	5.5237
Gm33.2	Gm 33	-4.29887	5.1517
Shales
GOV B 9.4*	Gm 29	-0.9	1.4097
GOV B 10.4*	Gm 30	-0.42	3.5714
GOV B 11.4*	Gm 31	-0.91	3.5249
Gm31.2	Gm 31	-0.814933	1.2267
Gm32.3	Gm 32	-2.79479	3.1969
Gm33.2	Gm 33	-4.29887	5.1517
Correlation coefficient shales					TIC contents in red were measured on samples from this study (labeled GmXX) corresponding to samples from the same stragraphic level analysed by Bernardi (2013); Gm28.5 for GOV B 9.3*; Gm29.2 for GOV B 9.4*; Gm30.1 for GOV B 10.4*; Gm31.1 for GOV B 11.4*. We do not consider samples with co-occurrence of calcite and dolomite, and samples from Bernardi (2013) for which TIC contents are offset to co…
-0.664947
Marls
GOV B 9.3*	Gm 28	-1.3	3.8498
Gm29.3	Gm 29	-2.70041	5.9989
Gm31.3	Gm 31	-1.48073	4.8444
Gm31.5	Gm 31	-0.404747	2.1127
Gm32.4	Gm 32	-4.17328	5.2807
Gm32.5	Gm 32	-2.61944	1.7758
Gm32.6	Gm 32	-4.22885	5.5237
Correlation coefficient shales
-0.567162
* samples from Bernardi, 2013
